# Supplementary material for: Spatial and temporal variability of snow accumulation for theSouth-Western Greenland Ice Sheet
Source: Copernicus journal article supplement (doi:10.5194/tc-2019-184), 2019-09-02
Supplement: Supplementary file [file tc-2019-184-AC1-supplement.pdf]

We thank both referees and the associated editor for very constructive and helpful comments. There were several points raised by both referees that addressed similar or equivalent points. We listed the common points of criticism first before individual comments of each referee are considered separately. Minor changes such as typos have been incorporated in the MS without listing them here. In order to improve readability, comments by the respective referee are listed in italic, while responses and modifications in the MS are written in regular typesetting. Sentences and paragraphs being incorporated in the manuscript are listed in bold letters here and in the manuscript. To keep the manuscript up to date, we checked for recent publications and included some wherever appropriate. Within the introduction, we included Mottram et al. (2019) as another source for changes in mass loss processes and added Lewis et al. (2019) as another example of extensive ground-based radar campaigns. In addition, we exchanged the previously referenced Lewis et al. (2019) discussion paper in TCD to the now published Lewis et al. (2019) TC paper.

### Common points of criticism:

- Both referees suggest to change the title of the manuscript. We decided to use the suggestion by Lynn Montgomery and changed the title to: **Relating regional and point measurements of accumulation in southwest Greenland.**
- Another point both referees criticize is the inconsistent/ interchangeable usage of SWE and snow accumulation within the manuscript. Surface mass balance (SMB) is solely used (and properly introduced, L27) within the introduction. Here, SMB is defined as ...sum of snow accumulation and lateral redistribution by sublimation, wind and runoff... This specifies the usage of the term “accumulation” and the importance of determining its spatial representativeness. In the revised manuscript, we consistently have changed the terminology to snow accumulation with symbol  $b_s$  and units [kg/m<sup>2</sup>].
- In addition, it has been suggested to simplify especially the section 2.3 dealing with spatial extrapolation. We now introduce terms such as variogram, nugget and anisotropy to facilitate readability of Section 2.3. Some radar terms are additionally explained as well.
- We modified the respective paragraphs in the introduction, which deal with objectives and scientific questions this work tries to answer. We fully agree that the main purpose of this manuscript is the relation of point measurements to regional accumulation. As stated by referee #1, the raised question (i) is a prerequisite to assess spatial representativeness and, hence, is removed from this listing. Since commonly applied in situ measurements of snow accumulations represent only a snapshot in time, it remains open whether accumulation patterns change with summer melt processes and are similar for two different winter accumulation season. We agree that the assessment of seasonal persistency cannot be properly determined with the available field data. However, since temporally continuous determinations of changes in accumulation are available and feasible in Greenland nowadays (upGPR, neutron probes), a relation of two consecutive years of data with point measurements is valuable and consequently is addressed in the results and discussion section. In addition, liquid water percolation has an effect on accumulation resulting in seasonal mass fluxes from the surface into deeper firn especially for

the investigated sites within the deep percolation zone of the Greenland Ice Sheet. We changed the respective paragraph to the following statement:

**The aim of this work is to relate point scales to regional scales of one to several square kilometers in area to improve our understanding of the representativeness of point measurements. For this purpose, we examine snow-pit and GPR data from two sites within the percolation zone of the GrlS and one site at the equilibrium line gathered over several field seasons. For each site, we investigate density variability between measurements from up to six snow pits within an area of 4 km<sup>2</sup> made in a single season, process radar transects of up to 25 km recorded in close proximity to those snow pits, and spatially extrapolate the radar-derived accumulation to estimate area-wide accumulation variability. For temporal comparisons, we use continuous observations of accumulation and melt recorded by upGPR \citep{Heilig2018}. Our results show that spatial representativeness of snow accumulation for a point measurement (snow pit) is high but values can be affected by local wind-induced surface roughness. We recommend to apply multiple snow depth measurements at the vicinity of the pits to better assess accumulation on regional scales.**

### Reply to referee #1 (Lynn Montgomery):

We highly appreciate comments raised by the referee and present a point-to-point reply for all issues being listed. For an improved readability and to facilitate direct response, we sometimes subdivided comments into several paragraphs referring to similar issues

#### *Comments to the Author Assessment*

*This is clearly an important study which adds quite a bit of knowledge to our community about the spatial variability accumulation and density in Southwest Greenland. The results that point measurements represent larger areas is very impactful. Overall, the science is sound and credible. However, my main point of concern is that the manuscript is extremely technical and difficult to follow at some points with concepts that require prior knowledge. It may discourage readers who are not fully comfortable with more in depth details of radar and some of the geostatistical methods. Clarification on several topics, detailed below, is needed for this to become a more readable paper.*

We appreciate the assessment by the reviewer, have facilitated readability and hope that it now meets expectations.

#### *Specific comments*

*The title is broad and a bit misleading. Three sites are examined in Southwest Greenland, however they are not representative of that entire area (as you state you can look at km wide results from this study). Along with this, the temporal aspect is questionable since there were only two consecutive years compared at Dye-2. The title should be narrowed to better represent what is being shown in the paper – i.e. “Relating regional and point measurements of accumulation in Southwest Greenland”.*

See above – we changed the title accordingly.

*Major Questions (L70-78) – The manuscript attempts to answer quite a few questions (4 stated in the end of the introduction). Question (ii) is your main gap for this study, we do not know how representative point measurements are on a spatial scale and this could be the main focus of the opening since the majority of the paper is about it. In the process, you determine internal reflection horizon error of radar measurements because that is necessary to see how accurate your measurements are, so (i) can be removed. Question 3 is important, though you only have two years of consecutive data at Dye-2 to work with, is this really a main research question of the manuscript or can it just be addressed in the text?*

*Question 4 is unclear, and a sentence follows to attempt to clarify it, however, it should be able to stand on its own. Are you trying to ask if meltwater percolation effects IRH layers?*

See above in the common introduction to our replies – we rephrased the entire paragraph to highlight the main purpose of the manuscript and to demonstrate that analysis of interannual similarities and lateral flow effects are necessary to increase the impact of this paper especially in terms of temporal generality. However, the stated questions are removed as suggested.

*Depending on the background of the reader, there is a lot of jargon in this article especially in the methods section. The manuscript should be generally self-contained and the reader should not have to dig too deep outside in other literature for concepts that are discussed. Specific topics in the paper that could use more clarification are the radar processing (L99-102), vertical sampling (section 2.2), and variograms/kriging (Section 2.3, Table 3). Even if just a few sentences are added as background that would be helpful, see more specific comments below.*

This point has been raised by referee #2 as well and, hence, is treated in the common section above. We rephrased and extended respective parts of the manuscript to address this criticism.

*Additionally, accumulation and SWE are used interchangeably in the text and figures in the manuscript. Be consistent with your terminology and use one or the other after you define what it is. Using both may confuse the reader if they are not familiar with this area.*

Agreed; see above, we changed SWE consistently to accumulation with symbol  $b_s$ .

*In-Line Suggested Changes:*

*L 11-13 Re-arrange sentence for clarity. “Randomly selected snowpits are...occurring with a probability of  $p = \dots$ ”.*

We have rephrased the abstract thoroughly as suggested by referee #2.

*L23-24 Can you move the citations to the end of the sentence? The placement interrupts the flow.*  
Changed accordingly.

*L27 Include Enderlin et al, 2014 reference (An improved mass budget for the Greenland ice sheet, <https://doi.org/10.1002/2013GL059010>) along with van den Broeke.*

Changed accordingly

*L28 “(with positive and negative sign)” – what are you referring to here? Needs to be clarified.*

Exchanged the brackets statement to: **“Depending on the location, lateral redistribution can increase SMB as well as decrease it.”**

*L29 “negative trends in SMBs”, SMB should not be plural.*

Changed accordingly.

*L29 “Most of the GrIS, accumulation is dominating factor.. negative trends related to surface melt and runoff” where are these positive and negative trends occurring? Clarify.*

Here, we refer to the GrIS in its entirety. We do not talk about specific regions within the ablation zone or areas where surface runoff or basal runoff are occurring. We included **“recent negative trends in SMB”** to clarify the temporal reference.

*L30 Remove “Despite their importance for the GrIS mass balance”*

Changed accordingly.

*L32 Snowfall can be measured by remote sensing through satellites (i.e. CloudSAT).i.e. Bennartz et al, 2019 (<https://doi.org/10.5194/acp-19-8101-2019>), etc.*

Here, we respectfully disagree. Bennartz et al. (2019) describe that “...CloudSAT provide ESTIMATES of snowfall in remote regions...”. They present several sources of uncertainties and “...approaches to mitigate these adverse effects...”. So we still keep the statement that snowfall cannot be measured but changed the phrase to: **This is because surface mass fluxes, such as snowfall and melt, cannot be measured by remote-sensing technology and derived estimates on snowfall can still have significant errors \citep{Bennartz2019}. Hence, predictions of SMB are usually obtained using scarce in situ measurements together with regional climate models (RCMs), which can introduce significant uncertainties \citep{Vernon2013} as well.**

*L33 “in concert” use another phrase here, take out “dedicated”*

Changed to: ...**together**...; dedicated has been removed

*L47 Remove “worked to” and change “link” to “linked”*

Changed accordingly.

*L56-58 “Still, quantification..” This is repeating the same point as earlier in the paragraph (L47) Probably only need to state this once even though it is an important point.*

Changed to: **“Since quantification of spatial representativeness of single point measurements for the surrounding square kilometers has only been conducted for one point in western Greenland so far \citep{Dunse2008}, there is a need to explore uncertainties at local and regional scales.”**. We consider this sentence as being valuable to highlight the motivation of this work.

*L61-69 This paragraph is a bit disjointed. It begins with surface melt affecting SMB to annual accumulation estimates and observations to validating RCMs to melt impacting firn layers and then stating that there is a gap in how melt impacts temporal changes in accumulation distribution. Needs better flow.*

Changed to: **Meltwater percolation can move mass from snow to the underlying firn (e.g., \citealp{Charalampidis2016,Humphrey2012,Heilig2018}) or even laterally along the surface slope \citep{Humphrey2012}. Hence, surface melt affects SMB (e.g., \citealp{Sasgen2012}) and accumulation \citep{Heilig2018}. However, it is unlikely that water percolation and mass redistribution are homogeneous over regional scales. Consequently, it is necessary to assess the impact of melt on temporal changes in accumulation distribution for the percolation zone of the GrlS.**

*L72 Remove “of altitude”.*

Removed.

*L70-78 See comments in Major Questions.*

Answered as stated above.

*L76 Clarify Question (iv) if it is kept here. It should be clear enough on its on that there should not be a “In other words” after.*

Question has been removed.

*L89, L83, L94 Remove coordinates and elevations from text and include this in table 1. It is very distracting.*

Coordinates are now included in Table 1.

*L99-102 Can this small section on radar units be combined with the paragraph above? Or can it be taken out and part of the table with a radar unit column?*

Since the information in brackets on the respective coordinates of the measurement locations were considered as being distracting, we decided to keep the paragraph as is.

*L104 Include a sentence or small clause about what and why dewow and bandpass filters for those who are not spun up about radar terminology.*

Changed to: **All recorded radar traces were processed in a very similar way. In case first arrivals were delayed by more than approximately 2 ns, we started with a correction for the DC shift. Offsets in the zero line of each radar trace (wow) were corrected utilizing a dewow function and low (approximately below 0.5 times the center frequency) and high frequency noise (approx. above 1.5 times the center frequency) were cut by bandpass filters. We further applied background removals to minimize direct wave influences.**

*(L116?) Equation 2 - Define beta.*

We included: ...**the exponent  $\beta=0.5$  (related to a medium with random orientation at the micro scale)**, ...We apologize for this.

*L127 – Could you include the depth of the bulk density that you took from the snowpits?*

The bulk density is calculated over the entire snow column. We did not define samples of a specific depth as being representative of the bulk. As requested, we included snow depth values in Table 2 and included: **(see Table 2 for details).**

*L129 – Why do you include NASA-SE and EKT? They do provide you with two more range values but they are not relevant for SW Greenland. These sites are not brought up again later for any other analysis so could they be removed?*

We included description of the sites within the methodology and used the presented data for extension of the conclusions of regional spatial variability in snow density within the discussion section. **As these two sites are located within a distance of 45–60 km of the GrIS ice divide (W of the divide - EKT and E of the divide - NASA SE, see Figure 1), they extent our data analysis of spatial variability of  $\rho_s$  to the dry-snow zone. The recorded pits at NASA SE provide data for a high accumulation site as well.**

*L133 – “For all three sites”, similar to comment above, you are talking about five sites in this section but now only reference three in SW Greenland.*

Changed to: **For all three transect sites...**

*L138 – Is vertical sampling related to the frequency of the radar? If so, state this. Also, what is an example of small scale surface roughness? Are these not wind features?*

No, vertical sampling rates are related to the depth ranges selected (time window length of the radar acquisition) and the sampling frequency (how many samples are measured within the selected range). Since we intended to use the recorded data also for other purposes such as analyzing deeper firn stratigraphy, the selected range and sampling rates were a trade off in between vertical resolution and depth. Concerning the second question, you are right small scale surface roughness are mostly related to wind features as being introduced in the subsequent sentence.

*L149 – Change “picked consistently” to “consistently picked”*

Changed accordingly.

*L172 – Need an explanation of variograms prior to using it consistently throughout the next section.*

*L187-193 – Using variograms consistently now, the term or concept needs to be explained prior for readers unfamiliar.*

We extended the following sentence to introduce the term variogram: **\citet{Webster2007} state that sample size is directly related to the precision of variogram estimates, while variograms are used to estimate the variance of a parameter (here snow accumulation) at increasing intervals of distance in between measurements and in multiple directions.**

*L174 – Add a comma after “First”*

Changed accordingly.

*L175 – Clarify “there are no gaps in accumulation in between”, are there no gaps in the radar transmission of the accumulation?*

We modified the phrase within the brackets to: **...(accumulation occurred everywhere within the area of interest, governed by local weather conditions).** However, the entire subsection changed significantly. ...

*L186 – “Despite the trend removal, anisotropy of the covariance...”, unclear on what this means?*

See above, the section was rephrased. The respective sentence reads now: **In addition, we found directional anisotropy of the covariance in all of the longer transects, which means that accumulation variation varies with direction.**

*L197-198 – Define  $b_s$  and  $b_n$  in the sentence before the equation. They are stated but adding in the variables adds another layer of clarification.*

Changed accordingly.

*L198 – “In the following” – what is this referring to? The following figure(s)?*

Changed to: **In Figures 4, 6 and 7,**

*L199 – Re-arrange this sentence. “Using the recorded radar traces, it is determined whether any randomly located...”*

Changed accordingly.

*L208 – Back to the “Major Questions” point brought up above, the step to assess errors associated with TWT is necessary for your main question (ii) of the paper. This is stated as the first sentence. Is it necessary for this to be a major question in the opening since this is already a part of answering your other question? Clearly, this is a major result and should be discussed (as it is in the paper) but it is not necessarily the focus as the other question(s) are.*

See above – the respective paragraph has been changed significantly and all listed questions are removed. As suggested, we focus on spatial representativeness whereas liquid water percolation as well as multiple radar acquisitions are supportive to assess representativeness and reach a broader impact as just singular point observations in time.

*L210 – Is “accumulation pattern persistence” the same thing as inter-annual variability? The analysis is how accumulation is changing over space and time.*

We have modified the language and removed term “accumulation pattern persistence”. We now describe changes within the two consecutive accumulation season observations at Dye-2.

*L211 – The wording of “whether seasonal changes in accumulation due to melt and liquid water percolation have major effects on accumulation pattern” is confusing. How would there be seasonal changes in accumulation due to melt? What is meant by accumulation pattern? How accumulation would change spatially due to melt? Is the question about how meltwater influences thickness of the layer? Please clarify this.*

We clarified to: **Finally, we investigate how accumulation changes due to melt and liquid-water percolation.**

*L222-223 – how deep were these snow pits?*

We included a column in Table 2 with mean snow depths and included the following phrase: ...distances between ranged from a few meters up to 1 km, **while snow depths ranged: from 0.83 m to 1.70 m.**

*L221 – Is it five locations in SW Greenland? The NASA-SE site is in SE Greenland, though the EKT site could be considered to be in SW Greenland.*

Changed to ...southern GrIS.... In addition, we included: **The inclusion of two more sites close of the southern Greenland ice divide extends the data set to a low accumulation site west of the ice divide (EKT:  $\bar{b}_s \sim 300 \text{ kg/m}^2$ ) and a high accumulation sites east of the divide (NASA SE:  $\bar{b}_s \sim 600 \text{ kg/m}^2$ ).**

*L247 – Is “8-10m” the scale of the wind generated surface features causing minimums?*

Changed to: **However, the observed minimums in  $b_s$  along the south-north transect lines are at regular distances between 8—10 m and are likely the result of wind-generated surface features.**

*L252 – Earlier the “SWE” is referenced as “scaled accumulation”,  $b_{s,N}$ . (Section 2.3) Can you reference back to this for clarity as the variable?*

Modified to: **Figure 4b displays the scaled accumulation distribution ( $b_{s,N}$ ) through box plots.**

*L293-295 – “which represents not averaging snow depth around the snow pit”. This is unclear, why would the area around the snow pit be averaged in?*

Changed to: **The unfiltered data, however, show a decreased representativeness with  $p=0.89$  in 2015/16 and  $p=0.77$  in 2016/17 for the same uncertainty range of  $\pm 10\%$ . Here snow depth is solely derived from the snow pit. Such values demonstrate that  $b_s$  data derived simply from a snow pit without averaging snow depth for an area around the pit location will decrease the area-wide representativeness at Dye-2.**

*L324 – “However...” does this refer to KAN-U? Can you combine this with the previous sentence for clarity?*

We included: **However, we consider a probability of  $p \geq 0.8$  with uncertainty of  $\pm 10\%$  for both study sites as a resilient estimate.**

*Section 3.3 – Frankly, could take out the KAN-U comparison with such a small area overlapped and not having consecutive years of data, there is no real major conclusions to be drawn here and it is not brought up again in the paper.*

Changed as suggested to:

**At KAN-U only  $0.16 \text{ km}^2$  were covered during both radar acquisitions and, consequently, we do not investigate changes in accumulation for spring 2013 and 2017. For Dye-2, we recorded radar transects for two consecutive winter accumulation seasons. However, multi-year intersecting radar transects and, hence, spatially-consistent area-wide  $b_s$  estimates are reduced. The intersecting area at Dye-2 comprises roughly  $1.7 \text{ km}^2$ . Here, we observe a slight trend in the north - south direction for both accumulation seasons (Figure 6a and b). While the most southerly parts of the transect show above**



area-wide average  $b_s$  values, the northern fringes are below the arithmetic mean of the area in  $b_s$ . However, for both years the trends (in north to south direction) are statistically non-significant and very low at 5 kg/m<sup>2</sup> per 1 km for 2015/16 and 8 kg/m<sup>2</sup> per 1 km for 2016/17. The respective coefficients of determination of accumulation with latitude are very low as well ( $R^2=0.15$  - 2015/16 and  $R^2=0.25$  - 2016/17).

The parallel stripes, mainly visible in Figure 6b for the southern parts, are certainly artifacts provoked by the grid design and the applied kriging. Local maximums in regular distances (150 – 220 m) occur along the transect line, however, the spatial extrapolation of these features is impossible due to the applied radar grid.

To quantitatively assess agreement in accumulation patterns, we used the respective normalized accumulation data and calculated the quotient. The cumulative data distribution of the quotients is presented in Figure 8. A constant area-wide quotient of 1 would imply that the normalized accumulation patterns are exactly equal. For Dye-2, the probability of data being equally distributed in May 2016 and 2017 with a given uncertainty of  $\pm 10\%$  is  $p \geq 0.95$ , meaning all intersecting locations of the accumulation pattern in two consecutive years at Dye-2 are similar.

*L349 – example here to explain the figure is great for clarity.*

Thanks

*L363 – Will using a firn core instead of a density pit induce any further uncertainty?*

No, but it was impossible to dig down to the end-of-summer-horizon 2015 just using snow shovels. We did not have a chain saw with us for this field campaign and, hence, collected density data in a firn core. We do not consider that the firn core is providing more uncertainty but the method is different, which should be mentioned here.

*L368 – Can you use a Delta symbol?*

Corrected, we had a missing \ in the previous version. We apologize for this.

*L370 – Artifacts in the sense that the GPR data from the winter accumulation was greater than the net accumulation?*

Artifacts in the sense that the accumulation in September 2016 was higher than in May 2016. Due to the fact that summer melt 2016 was significantly above average in terms of area extent in surficial melt (see Heilig et al. 2018 for details), it is unlikely that for specific locations accumulation increased while the average decrease in  $b_s$  is at 51 kg/m<sup>2</sup>. Those artifacts most likely arise from singular outliers in kriged accumulation and are restricted to only six pixels. We included: **....are likely artifacts due to kriging outliers and errors...** to clarify the sentence.

*L375 – If the ice movement is known from the upGPR site, can it be corrected for?*

We only have a rough location estimate from handheld GPS data. We do not consider such accuracies as adequate to correct all radar locations even though location uncertainties (5-10 m) are likely smaller than the annual ice movement (~25 m). However, accumulation values are extrapolated for 20 m by 20 m pixel sizes. It is debatable, whether co-locating GPR transects would decrease discrepancies of accumulation values from May 2016 to September 2016.

*Section 4 – Conclusions – This very nicely ties up the study concisely and answers the questions put forth in the opening. If some questions are taken out, needs to be revised.*

Although, we removed the questions from the introduction, we do not think that the conclusion section has to be changed significantly. The term “interannual persistence” was removed throughout the



manuscript. So the respective paragraph in the conclusions changed to: **Our results suggest that there is only little change of accumulation patterns at Dye-2 for spring 2016 and 2017. However, the data only span two consecutive accumulation seasons that were very similar in average density and accumulation. As such, we cannot confirm whether such persistence might be observed in seasons with significantly more or less accumulation or at different sites; this is a topic for future work.**

*Figures and Tables Comments: For all figures: make sure if it is a multi-paneled plot, that the (a)/(b)/(c) are either inside or outside of the figures consistently. i.e. figure 4 a is outside the box and b is inside the box.*

Has been changed as required.

*Table 1 – Move KAN-U April 2017 before Dye-2 May 2017 if table is supposed to be chronological. Include coordinates of sites and elevations in table. Possibly include radar units in table as well?*

We intended to have the table sorted alphabetical and chronological. You are right, since chronological comes first, we have to switch KAN-U up. Same appears for Table 2. We tried to include radar units but after including coordinates as suggested there is not enough space left for radar details other than antenna frequency.

*Figure 1 – Is OK how it is currently, but a little unclear - could take off elevation markings and put a color bar labeling elevations to see if it made the graphic a little less cluttered. Difficult to see the 500m marking near the coast. Not sure if the 1000,1500m elevations are labelled at all?*

We removed the contour labeling and included a colorbar for the elevation bands – as suggested.

*Table 2 – See comments from above, take out NASA-SE and EKT if they are not relevant for the rest of the study. Possible include depth of the pit? For the density ranges, could you use something other than “-“ in the range column? It could confuse the reader if they did not scan the text for what the range meant.*

We changed the dash for the density ranges to “to”. The column headline has been modified as well to clarify that density ranges are given. We kept EKT and NASA SE since they extend the presented density variation to a factor of 2 in accumulation.

*Figure 3 – Recommend using colors other than red and green stacked on one another for colorblind purposes. Could use a dashed line or a thicker line of another color.*

The respective color for KAN-U 2012/13 has been changed from green to purple to account for colorblind purposes. In case you are referring to Fig. 2, here, the red line has been changed to yellow to facilitate reading for colorblind persons.

*Figure 4 – Similar comment to above, try a different color than red and green since the lines are close to one another. Could use transparency to see the standard normal distribution behind.*

Fig. 4 has no green and red lines. We assume, you refer to Fig. 3. However, we increased the line width of the standard normal distribution lines in Fig.3 as well.

*Figure 4/ Figure 5 – Can these be combined into a 3 panel plot since you’re talking about the same area?*

You are certainly correct and we attempted to combine those plots into one single figure. However, since TC will be printed as two-column paper, a smaller 1 panel plot will use less space than a 3 panel plot with a blank part underneath panel b.

*Table 3 – Never described what the major and minor axis are in the text for variograms. Does the mean prediction error need to be in the table if they are all 0 (except the first value of 0.01)?*

In Section 2.3, we included: **After trend removal, we found directional anisotropy of the covariance in all of the longer transects, which means that accumulation variation varies with direction. Hence, we modeled variograms with different ranges per direction. In Table 3, we present major and minor axis of the range ellipsoid used for the variogram modeling.**

*Figure 9 – Need colorbar for the contour on 9a, difficult to see two locations of upGPR.*

We included the colorbar for the elevation bands and tried to facilitate visibility of the upGPR locations.

*Figure 4,6,7,9 – A personal preference is to have coordinates in lat/lon instead of UTM. If the scales do not allow though, especially for an area like Swiss camp, that is fine because it is on a few km scale.*

As you mention, the respective areas are rather small and, hence, we prefer the UTM grid to remain consistent for all figures.

*Other comments: The word “very” is used quite a bit throughout the manuscript as a qualifier and those instances can be removed the majority of the time. Using it does not add to the meaning of the sentences.*

Thank you for this suggestion. We checked whether the usage of the word “very” was necessary in the context of each sentence and removed/ changed expressions wherever useful.
